# Supplementary material for: The structural diversity, band gap energy and photoluminescence properties of thiophenedicarboxylate based coordination polymers
Source: Royal Society of Chemistry journal article supplement (doi:10.1039/c5ce01886b), 2015-12-02
Supplement: c5ce01886b1.pdf [file c5ce01886b1.pdf]

## Electronic Supporting Information

### **The Structural Diversity, Band Gap Energy and Photoluminescence Properties of Thiophenedicarboxylate based Coordination Polymers**

Prabu M<sup>†a</sup>, K. S. Asha<sup>†a</sup>, Mekhola Sinha<sup>a</sup>, Anamika Poduval<sup>a</sup>, and Sukhendu Mandal<sup>\*a</sup>

<sup>a</sup>School of Chemistry, Indian Institute of Science Education and Research  
Thiruvananthapuram,  
Kerala, India-695016, E-mail: [sukhendu@iisertvm.ac.in](mailto:sukhendu@iisertvm.ac.in)

<sup>†</sup> Both PM and KSA made equal contribution to this work.

Table S1. Crystallographic parameters for compounds **1 - 5** respectively<sup>[a]</sup>.

| Parameters                                 | Compound 1                                                       | Compound 2                                                                      | Compound 3                                                                                    | Compound 4                                                                         | Compound 5                                                                          |
|--------------------------------------------|------------------------------------------------------------------|---------------------------------------------------------------------------------|-----------------------------------------------------------------------------------------------|------------------------------------------------------------------------------------|-------------------------------------------------------------------------------------|
| Empirical formula                          | C <sub>6</sub> H <sub>7</sub> Mg <sub>1.5</sub> O <sub>7</sub> S | C <sub>14</sub> H <sub>4</sub> Mg <sub>1.5</sub> NO <sub>8</sub> S <sub>2</sub> | C <sub>18</sub> H <sub>18</sub> Mg <sub>2</sub> N <sub>2</sub> O <sub>10</sub> S <sub>2</sub> | C <sub>26</sub> H <sub>16</sub> N <sub>3</sub> O <sub>8.50</sub> S Zn <sub>2</sub> | C <sub>7</sub> H <sub>2</sub> In <sub>0.50</sub> N <sub>0.50</sub> O <sub>4</sub> S |
| Formula weight                             | 259.64                                                           | 414.77                                                                          | 535.08                                                                                        | 701.28                                                                             | 246.56                                                                              |
| Crystal System                             | Monoclinic                                                       | Triclinic                                                                       | Monoclinic                                                                                    | Monoclinic                                                                         | Tetragonal                                                                          |
| Space Group                                | <i>P</i> 2 <sub>1</sub> / <i>c</i> (No.14)                       | <i>P</i> -1 (No.2)                                                              | <i>P</i> 2 <sub>1</sub> / <i>n</i>                                                            | <i>C</i> 2/ <i>c</i>                                                               | <i>P</i> 43 22                                                                      |
| a(Å)                                       | 6.4499 (3)                                                       | 9.6615 (3)                                                                      | 10.0483(2)                                                                                    | 34.681(3)                                                                          | 13.5642(13)                                                                         |
| b(Å)                                       | 19.1637 (8)                                                      | 10.4900 (3)                                                                     | 13.4969(3)                                                                                    | 15.3678(13)                                                                        | 13.5642(13)                                                                         |
| c(Å)                                       | 8.0685 (3)                                                       | 11.9404 (3)                                                                     | 16.7346(4)                                                                                    | 13.7141(10)                                                                        | 15.6425(12)                                                                         |
| α(°)                                       | 90                                                               | 110.2950 (10)                                                                   | 90                                                                                            | 90                                                                                 | 90                                                                                  |
| β(°)                                       | 96.557                                                           | 91.8750 (10)                                                                    | 93.6830(10)                                                                                   | 112.169(4)                                                                         | 90                                                                                  |
| γ(°)                                       | 90                                                               | 114.8600 (10)                                                                   | 90                                                                                            | 90                                                                                 | 90                                                                                  |
| Volume (Å <sup>3</sup> )                   | 990.77 (7)                                                       | 1006.93 (5)                                                                     | 2264.87(9)                                                                                    | 6768.9(9)                                                                          | 2878.0(6)                                                                           |
| Z                                          | 4                                                                | 2                                                                               | 4                                                                                             | 8                                                                                  | 8                                                                                   |
| Calculated density (g/cm <sup>3</sup> )    | 1.741                                                            | 1.368                                                                           | 1.569                                                                                         | 1.376                                                                              | 1.138                                                                               |
| θ range (°)                                | 2.125to28.427                                                    | 1.860 to 28.573                                                                 | 1.940 to 28.320                                                                               | 1.268 to 24.351                                                                    | 3.006 to 28.282                                                                     |
| Absorption coefficient (mm <sup>-1</sup> ) | 0.436                                                            | 0.349                                                                           | 0.349                                                                                         | 1.587                                                                              | 0.992                                                                               |
| Reflections collected                      | 9372                                                             | 17817                                                                           | 22714                                                                                         | 21964                                                                              | 13786                                                                               |
| Unique reflections                         | 2468                                                             | 5058                                                                            | 5637                                                                                          | 5487                                                                               | 3579                                                                                |
| Goodness-of-fit                            | 1.166                                                            | 1.112                                                                           | 1.039                                                                                         | 1.069                                                                              | 1.071                                                                               |
| Number of parameters                       | 145                                                              | 241                                                                             | 311                                                                                           | 388                                                                                | 119                                                                                 |
| Final R indices [I>2σ(I)]                  | R1= 0.0392, wR2= 0.1014                                          | R1= 0.0733, wR2= 0.2561                                                         | R1=0.0511, wR2= 0.1339                                                                        | R1=0.0515, wR2 = 0.1855                                                            | R1=0.0364, wR2= 0.0959                                                              |

$$^{[a]}R_1 = \Sigma||F_0| - |F_c|| / \Sigma|F_0|; wR_2 = \{[w(F_0^2 - F_c^2)^2] / [w(F_0^2)^2]\}^{1/2};$$

$$w = 1/[\sigma^2(F_0)^2 + (aP)^2 + bP]; P = [\max(F_0^2, 0) + 2(F_c)^2]/3$$

Table S2: Selected bond lengths of compound **1**.

| Compound <b>1</b> | Bond Length |
|-------------------|-------------|
| Mg(1)-O(2) #1     | 2.0499(15)  |
| Mg(1)-O(2)        | 2.0500(15)  |
| Mg(1)-O(1)        | 2.0711(15)  |
| Mg(1)-O(1) #1     | 2.0711(15)  |
| Mg(1)-O(7) #2     | 2.1078(15)  |
| Mg(1)-O(7) #3     | 2.1078(15)  |
| Mg(2)-O(2) #5     | 2.0508(17)  |
| Mg(2)-O(2)        | 2.0550(16)  |
| Mg(2)-O(6) #6     | 2.0787(17)  |
| Mg(2)-O(5)        | 2.0937(17)  |
| Mg(2)-O(3)        | 2.5680(17)  |
| Mg(2)-O(4)        | 2.1861(19)  |

Symmetry transformations used to generate equivalent atoms:

#1  $x-1,y,z$  #2  $-x-1,-y,-z$  #3  $-x,-y,-z$

#4  $x,y+1,z$  #5  $-x-1,-y,-z+1$  #6  $x+1,y,z$

Table S3: Selected bond lengths of compound **2**.

| Compound <b>2</b> | Bond Length |
|-------------------|-------------|
| Mg(1)-O(3)        | 1.998(3)    |
| Mg(1)-O(5) #1     | 2.016(3)    |
| Mg(1)-O(1)        | 2.043(3)    |
| Mg(1)-O(4)        | 2.051(3)    |
| Mg(1)-O(2)        | 2.162(3)    |
| Mg(1)-O(7)        | 2.220(2)    |
| Mg(2)-O(8) #2     | 2.056(2)    |
| Mg(2)-O(8)        | 2.056(2)    |
| Mg(2)-O(6) #3     | 2.073(2)    |
| Mg(2)-O(6) #1     | 2.073(2)    |
| Mg(2)-O(7) #2     | 2.121(2)    |
| Mg(2)-O(7)        | 2.121(2)    |

Symmetry transformations used to generate equivalent atoms:

#1  $-x, -y+1, -z$  #2  $x, -y+1/2, z-1/2$  #3  $-x, y+1/2, -z+1/2$

Table S4: Selected bond lengths of compound **3**.

| Compound <b>3</b> | Bond Length |
|-------------------|-------------|
| Mg(1)-O(2)#2      | 1.986(2)    |
| Mg(1)-O(5)#3      | 2.042(2)    |
| Mg(1)-O(6)        | 2.043(2)    |
| Mg(1)-O(1)        | 2.044(2)    |
| Mg(1)-O(3)        | 2.070(2)    |
| Mg(1)-O(4)        | 2.2124(19)  |
| Mg(1)-Mg(2)       | 3.4897(12)  |
| Mg(2)-O(8)#3      | 2.0226(19)  |
| Mg(2)-O(10)       | 2.040(2)    |
| Mg(2)-O(9)        | 2.043(2)    |
| Mg(2)-O(7)        | 2.062(2)    |
| Mg(2)-O(9)#4      | 2.2004(19)  |
| Mg(2)-O(4)        | 2.323(2)    |
| Mg(2)-C(3)        | 2.614(3)    |
| Mg(2)-C(2)        | 2.714(3)    |
| Mg(2)-O(6)        | 2.725(3)    |
| Mg(2)-Mg(2)#4     | 3.2974(17)  |

Symmetry transformations used to generate equivalent atoms:

#1  $x+1/2, -y+1/2, z+1/2$  #2  $-x+1, -y+1, -z$

#3  $-x+1/2, y-1/2, -z+1/2$  #4  $-x+1, -y, -z$

#5  $-x+1/2, y+1/2, -z+1/2$  #6  $x-1/2, -y+1/2, z-1/2$

Table S5: Selected bond lengths of compound **4**.

| Compound <b>4</b> | Bond Length |
|-------------------|-------------|
| Zn(1)-N(1)        | 2.019(5)    |
| Zn(1)-O(8)        | 2.028(4)    |
| Zn(1)-O(1)        | 2.031(4)    |
| Zn(1)-O(5)        | 2.030(4)    |
| Zn(1)-O(4)        | 2.067(5)    |
| Zn(1)-Zn(2)       | 3.0152(9)   |
| Zn(2)-N(2)        | 2.029(5)    |
| Zn(2)-O(7)        | 2.030(4)    |
| Zn(2)-O(6)        | 2.034(4)    |
| Zn(2)-O(3)        | 2.044(4)    |
| Zn(2)-O(2)        | 2.048(4)    |

Symmetry transformations used to generate equivalent atoms:

#1  $x, -y, z+1/2$  #2  $x, -y+1, z+1/2$  #3  $x, -y+1, z-1/2$

#4  $x, -y, z-1/2$  #5  $x-1/2, -y+1/2, z-1/2$

#6  $x+1/2, -y+1/2, z+1/2$  #7  $-x, y, -z+1/2$

Table S6: Selected bond lengths of compound **5**.

| Compound <b>5</b> | Bond Length |
|-------------------|-------------|
| In(1)-O(2)#1      | 2.212(4)    |
| In(1)-O(2)        | 2.212(4)    |
| In(1)-O(3)        | 2.231(4)    |
| In(1)-O(3)#1      | 2.231(4)    |
| In(1)-O(4)        | 2.328(4)    |
| In(1)-O(4)#1      | 2.329(4)    |
| In(1)-O(1)#1      | 2.375(4)    |
| In(1)-O(1)        | 2.375(4)    |
| In(1)-C(1)#1      | 2.631(5)    |
| In(1)-C(1)        | 2.631(5)    |
| In(1)-C(2)#1      | 2.634(6)    |
| In(1)-C(2)        | 2.634(6)    |

Symmetry transformations used to generate equivalent atoms:

#1  $-x+1, y, -z$  #2  $-y+1, x-1, z-1/4$  #3  $y+1, -x+1, z+1/4$  #4  $x, -y, -z+1/2$

## Topos for compound 1

### Topology for Mg1

Atom Mg1 links by bridge ligands and has

| Common vertex with                   | R(A-A)  | f |
|--------------------------------------|---------|---|
| Mg 2 -0.4742 0.9819 -0.3155 (-1 1-1) | 9.967A  | 1 |
| Mg 2 0.4742 0.0181 0.3155 (1-1 0)    | 9.967A  | 1 |
| Mg 1 0.0000 1.0000 -0.5000 (0 0-1)   | 10.396A | 1 |
| Mg 1 0.0000 0.0000 0.5000 (0-1 0)    | 10.396A | 1 |
| Mg 1 0.0000 0.0000 -0.5000 (0-1-1)   | 10.396A | 1 |
| Mg 1 0.0000 1.0000 0.5000 (0 0 0)    | 10.396A | 1 |
| Mg 2 0.5258 -0.0181 -0.3155 (0 0-1)  | 10.887A | 1 |
| Mg 2 -0.5258 1.0181 0.3155 (0 0 0)   | 10.887A | 1 |
| Common edge with                     | R(A-A)  |   |
| Mg 2 0.5258 0.5181 0.1845 (0 0 0)    | 3.562A  | 2 |
| Mg 2 -0.5258 0.4819 -0.1845 (0 1 0)  | 3.562A  | 2 |
| Mg 2 0.4742 0.4819 -0.1845 (1 1 0)   | 3.568A  | 2 |
| Mg 2 -0.4742 0.5181 0.1845 (-1 0 0)  | 3.568A  | 2 |

### Topology for Mg2

Atom Mg2 links by bridge ligands and has

| Common vertex with                 | R(A-A)  | f |
|------------------------------------|---------|---|
| Mg 2 0.4742 1.0181 0.3155 (1 0 0)  | 9.650A  | 1 |
| Mg 2 0.4742 0.0181 0.3155 (1-1 0)  | 9.650A  | 1 |
| Mg 1 1.0000 1.0000 0.5000 (1 0 0)  | 9.967A  | 1 |
| Mg 1 0.0000 0.0000 0.5000 (0-1 0)  | 10.887A | 1 |
| Common edge with                   | R(A-A)  |   |
| Mg 2 0.4742 0.4819 -0.1845 (1 1 0) | 3.038A  | 2 |
| Mg 1 0.0000 0.5000 0.0000 (0 0 0)  | 3.562A  | 2 |
| Mg 1 1.0000 0.5000 0.0000 (1 0 0)  | 3.568A  | 2 |

### Structural group analysis

Structure consists of 3D framework with S2Mg3O14C12H14

### Coordination sequences

Mg1: 1 2 3 4 5 6 7 8 9 10





## Topos for compound 2

### Topology for Mg1

Atom Mg1 links by bridge ligands and has

| Common vertex with                  | R(A-A)  | f |
|-------------------------------------|---------|---|
| Mg 1 -0.4714 0.0844 0.3266 (-1 0 0) | 9.661A  | 1 |
| Mg 1 1.5286 0.0844 0.3266 (1 0 0)   | 9.661A  | 1 |
| Mg 2 -0.5000 0.0000 0.0000 (-1 0 0) | 10.120A | 1 |
| Mg 2 0.5000 1.0000 1.0000 (0 1 1)   | 10.285A | 1 |
| Mg 1 0.5286 -0.9156 0.3266 (0-1 0)  | 10.490A | 1 |
| Mg 1 0.5286 1.0844 0.3266 (0 1 0)   | 10.490A | 1 |
| Mg 2 1.5000 0.0000 0.0000 (1 0 0)   | 10.538A | 1 |
| Mg 2 0.5000 -1.0000 0.0000 (0-1 0)  | 10.545A | 1 |

| Common edge with                   | R(A-A) |   |
|------------------------------------|--------|---|
| Mg 1 0.4714 -0.0844 0.6734 (1 0 1) | 5.001A | 2 |
| Mg 1 0.4714 0.9156 0.6734 (1 1 1)  | 8.522A | 2 |

| Common face with                  | R(A-A) |   |
|-----------------------------------|--------|---|
| Mg 2 0.5000 0.0000 0.0000 (0 0 0) | 3.660A | 3 |

### Topology for Mg2

Atom Mg2 links by bridge ligands and has

| Common vertex with                   | R(A-A)  | f |
|--------------------------------------|---------|---|
| Mg 1 -0.5286 -0.0844 -0.3266 (0 0 0) | 10.120A | 1 |
| Mg 1 1.5286 0.0844 0.3266 (1 0 0)    | 10.120A | 1 |
| Mg 1 0.5286 -0.9156 -0.6734 (0-1-1)  | 10.285A | 1 |
| Mg 1 0.4714 0.9156 0.6734 (1 1 1)    | 10.285A | 1 |
| Mg 1 1.4714 -0.0844 -0.3266 (2 0 0)  | 10.538A | 1 |
| Mg 1 -0.4714 0.0844 0.3266 (-1 0 0)  | 10.538A | 1 |
| Mg 1 0.4714 -1.0844 -0.3266 (1-1 0)  | 10.545A | 1 |
| Mg 1 0.5286 1.0844 0.3266 (0 1 0)    | 10.545A | 1 |

  

| Common edge with                    | R(A-A) |   |
|-------------------------------------|--------|---|
| Mg 2 -0.5000 0.0000 0.0000 (-1 0 0) | 9.661A | 2 |
| Mg 2 1.5000 0.0000 0.0000 (1 0 0)   | 9.661A | 2 |

  

| Common face with | R(A-A) |  |
|------------------|--------|--|
|------------------|--------|--|



### Topos for compound 3

Atom Mg1 links by bridge ligands and has

| Common vertex with | R(A-A)  |         |         | f         |         |   |
|--------------------|---------|---------|---------|-----------|---------|---|
| Mg 2               | 0.4707  | -0.1029 | -0.0512 | ( 1 0 0)  | 6.205A  | 1 |
| Mg 2               | 0.0293  | 0.3971  | -0.4488 | (-1 0 -1) | 8.610A  | 1 |
| Mg 2               | -0.0293 | 0.6029  | 0.4488  | ( 0 0 0)  | 9.254A  | 1 |
| Mg 2               | 0.9707  | 0.6029  | 0.4488  | ( 1 0 0)  | 9.445A  | 1 |
| Mg 1               | 0.9078  | 0.1562  | 0.5257  | ( 0 0 0)  | 9.811A  | 1 |
| Mg 1               | -0.0922 | 0.1562  | -0.4743 | (-1 0 -1) | 9.811A  | 1 |
| Mg 1               | 0.9078  | 0.1562  | -0.4743 | ( 0 0 -1) | 10.347A | 1 |
| Mg 1               | -0.0922 | 0.1562  | 0.5257  | (-1 0 0)  | 10.347A | 1 |
| Mg 2               | 1.0293  | 0.3971  | -0.4488 | ( 0 0 -1) | 10.437A | 1 |
| Mg 2               | 1.0293  | 0.3971  | 0.5512  | ( 0 0 0)  | 10.479A | 1 |
| Mg 1               | 0.0922  | -0.1562 | 0.4743  | ( 0 -1 0) | 10.724A | 1 |
| Mg 1               | 0.0922  | 0.8438  | 0.4743  | ( 0 0 0)  | 10.724A | 1 |

Common edge with R(A-A)

|      |        |        |         |          |        |   |
|------|--------|--------|---------|----------|--------|---|
| Mg 1 | 0.5922 | 0.6562 | -0.0257 | ( 1 1 0) | 4.708A | 2 |
|------|--------|--------|---------|----------|--------|---|

Common face with R(A-A)

|      |        |        |        |          |        |   |
|------|--------|--------|--------|----------|--------|---|
| Mg 2 | 0.5293 | 0.1029 | 0.0512 | ( 0 0 0) | 3.490A | 3 |
|------|--------|--------|--------|----------|--------|---|

### Topology for Mg2

Atom Mg2 links by bridge ligands and has

| Common vertex with | R(A-A) |         |         | f         |         |   |
|--------------------|--------|---------|---------|-----------|---------|---|
| Mg 1               | 0.5922 | -0.3438 | -0.0257 | ( 1 0 0)  | 6.205A  | 1 |
| Mg 1               | 0.9078 | 0.1562  | 0.5257  | ( 0 0 0)  | 8.610A  | 1 |
| Mg 1               | 0.0922 | -0.1562 | 0.4743  | ( 0 -1 0) | 9.254A  | 1 |
| Mg 1               | 1.0922 | -0.1562 | 0.4743  | ( 1 -1 0) | 9.445A  | 1 |
| Mg 2               | 0.0293 | 0.3971  | -0.4488 | (-1 0 -1) | 10.277A | 1 |
| Mg 2               | 1.0293 | 0.3971  | 0.5512  | ( 0 0 0)  | 10.277A | 1 |
| Mg 2               | 0.9707 | -0.3971 | 0.4488  | ( 1 -1 0) | 10.280A | 1 |





### Topos for compound 4

Atom Zn1 links by bridge ligands and has

| Common vertex with | R(A-A)  |         |                   | f       |   |
|--------------------|---------|---------|-------------------|---------|---|
| Zn 1               | 0.1120  | -0.2207 | 0.5658 (0 0 0)    | 9.645A  | 1 |
| Zn 1               | 0.1120  | -0.2207 | -0.4342 (0 0 -1)  | 9.645A  | 1 |
| Zn 2               | 0.2015  | 0.7202  | 0.6449 (0 1 0)    | 10.631A | 1 |
| Zn 2               | 0.2015  | -0.2798 | 0.6449 (0 0 0)    | 10.642A | 1 |
| Zn 2               | 0.2015  | 0.7202  | -0.3551 (0 1 -1)  | 10.743A | 1 |
| Zn 2               | 0.2015  | -0.2798 | -0.3551 (0 0 -1)  | 10.753A | 1 |
| Zn 1               | 0.1120  | 0.7793  | 0.5658 (0 1 0)    | 10.987A | 1 |
| Zn 1               | 0.1120  | 0.7793  | -0.4342 (0 1 -1)  | 10.987A | 1 |
| Zn 2               | -0.2985 | 0.2202  | -0.3551 (-1 0 -1) | 13.191A | 1 |

| Common face with | R(A-A) |        |                | f      |   |
|------------------|--------|--------|----------------|--------|---|
| Zn 2             | 0.2015 | 0.2798 | 0.1449 (0 0 0) | 3.015A | 4 |

### Topology for Zn2

Atom Zn2 links by bridge ligands and has

| Common vertex with | R(A-A) |         |                  | f       |   |
|--------------------|--------|---------|------------------|---------|---|
| Zn 2               | 0.2015 | 0.7202  | 0.6449 (0 1 0)   | 9.635A  | 1 |
| Zn 2               | 0.2015 | 0.7202  | -0.3551 (0 1 -1) | 9.635A  | 1 |
| Zn 1               | 0.1120 | 0.7793  | -0.4342 (0 1 -1) | 10.631A | 1 |
| Zn 1               | 0.1120 | -0.2207 | -0.4342 (0 0 -1) | 10.642A | 1 |
| Zn 1               | 0.1120 | 0.7793  | 0.5658 (0 1 0)   | 10.743A | 1 |
| Zn 1               | 0.1120 | -0.2207 | 0.5658 (0 0 0)   | 10.753A | 1 |
| Zn 2               | 0.2015 | -0.2798 | -0.3551 (0 0 -1) | 10.998A | 1 |
| Zn 2               | 0.2015 | -0.2798 | 0.6449 (0 0 0)   | 10.998A | 1 |
| Zn 1               | 0.6120 | 0.2793  | 0.5658 (0 0 0)   | 13.191A | 1 |

| Common face with | R(A-A) |        |                | f      |   |
|------------------|--------|--------|----------------|--------|---|
| Zn 1             | 0.1120 | 0.2207 | 0.0658 (0 0 0) | 3.015A | 4 |

### Structural group analysis

Structural group No 1

Structure consists of 3D framework with ZnSO4NC12H8

There are 2 interpenetrating nets







## Topos for compound 5

Atom In1 links by bridge ligands and has

| Common vertex with                   | R(A-A)  | f |
|--------------------------------------|---------|---|
| In 1 -0.0766 0.5000 -0.2500 ( 0 1-1) | 10.462A | 1 |
| In 1 1.0766 0.5000 0.2500 ( 1 0 0)   | 10.462A | 1 |
| In 1 0.0766 -0.5000 0.2500 ( 0-1 0)  | 10.462A | 1 |
| In 1 0.9234 -0.5000 -0.2500 ( 1 0-1) | 10.462A | 1 |

Structural group analysis

Structural group No 1

Structure consists of 3D framework with InS<sub>2</sub>O<sub>8</sub>C<sub>12</sub>H<sub>4</sub>

There are 2 interpenetrating nets

FIV: Full interpenetration vectors

[0,1,0] (13.56A)

[1,0,0] (13.56A)

[0,1,1] (20.70A)

[0,1,-1] (20.70A)

[1,0,1] (20.70A)

[1,0,-1] (20.70A)

PIC: [0,2,0][0,0,1][1,1,0] (PICVR=2)

Z<sub>t</sub>=2; Z<sub>n</sub>=1

Class Ia Z=2

Coordination sequences

In1: 1 2 3 4 5 6 7 8 9 10

Num 4 12 24 42 64 92 124 162 204 252

Cum 5 17 41 83 147 239 363 525 729 981

Rad 10.5(0.0) 16.9(2.0) 22.8(4.4) 29.6(5.0) 36.1(6.2) 43.1(6.8) 49.8(8.0) 56.9(8.7) 63.7(9.8)  
70.7(10.7)

Cmp In4 In12 In24 In42 In64 In92 In124 In162 In204 In252

TD10=981

Vertex symbols for selected sublattice

In1 Point symbol: {6<sup>6</sup>}

Extended point symbol:[6(2).6(2).6(2).6(2).6(2).6(2)]

Rings coincide with circuits

Rings with types: [6a(2).6a(2).6a(2).6a(2).6a(2).6a(2)]

Point symbol for net: {6^6}

4-c net; uninodal net

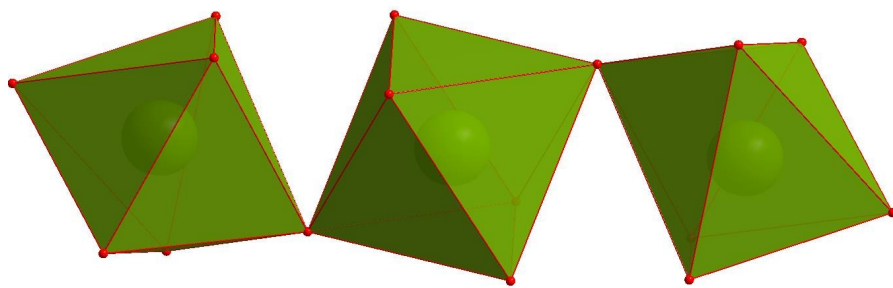

Fig. S1. The  $\text{Mg}_3\text{O}_{16}$  cluster present in compound **2**. Green: Mg and Red; Oxygen ions, respectively.

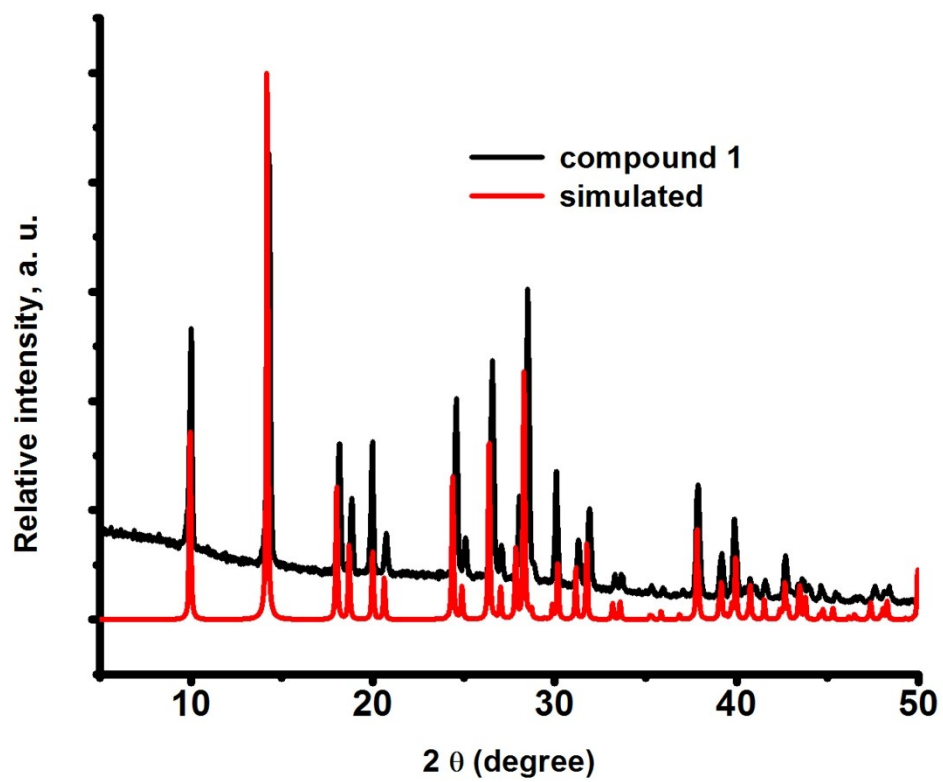

Fig. S2. Powder XRD pattern of compound 1.

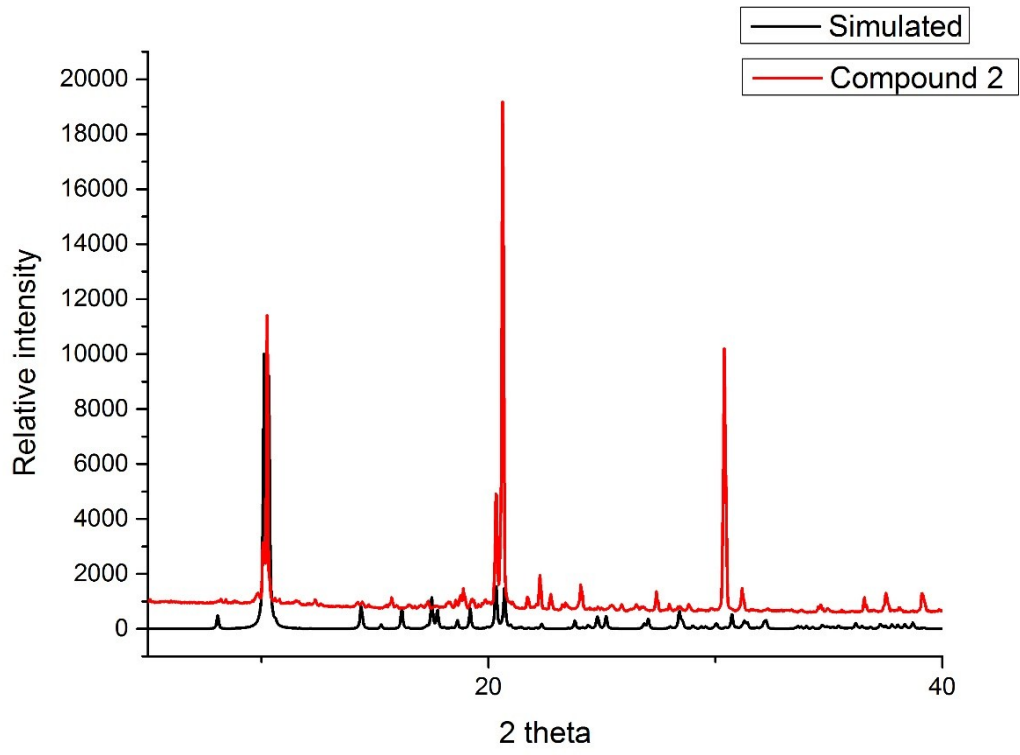

Fig. S3. Powder XRD pattern of compound 2.

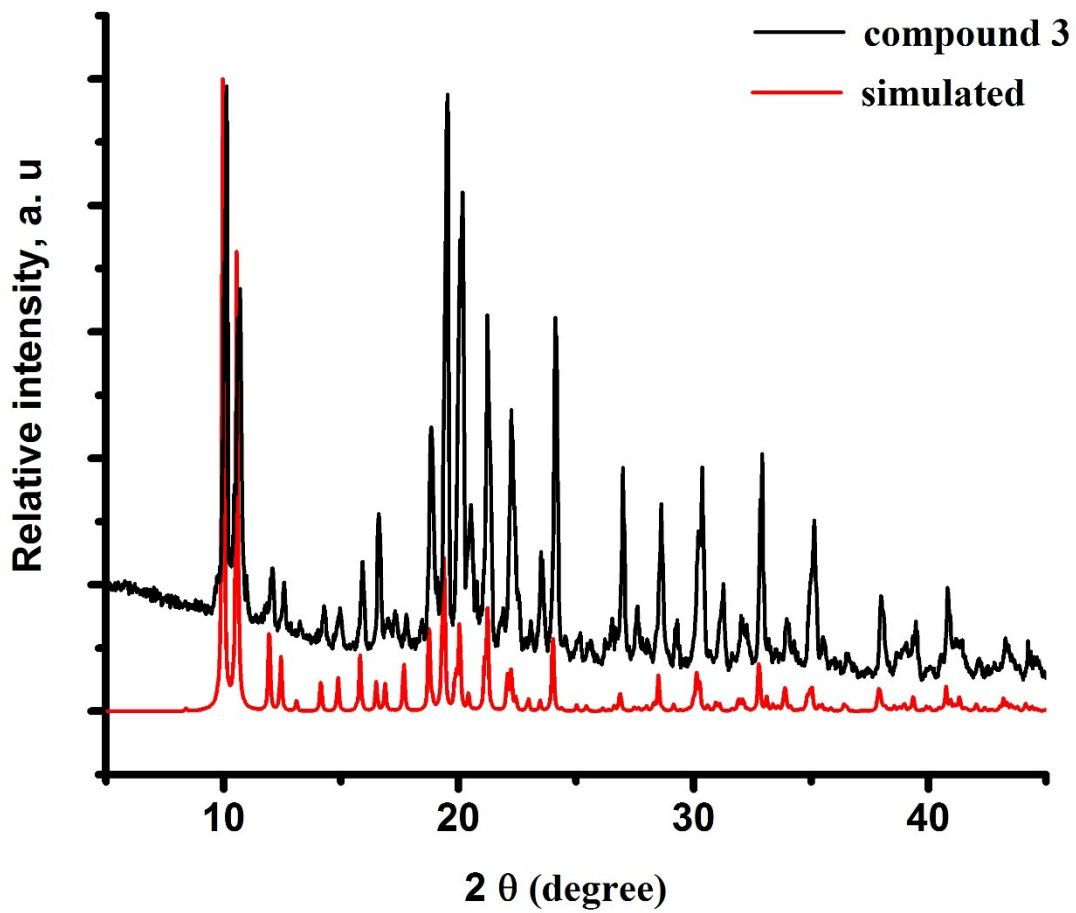

Fig. S4. Powder XRD pattern of compound 3.

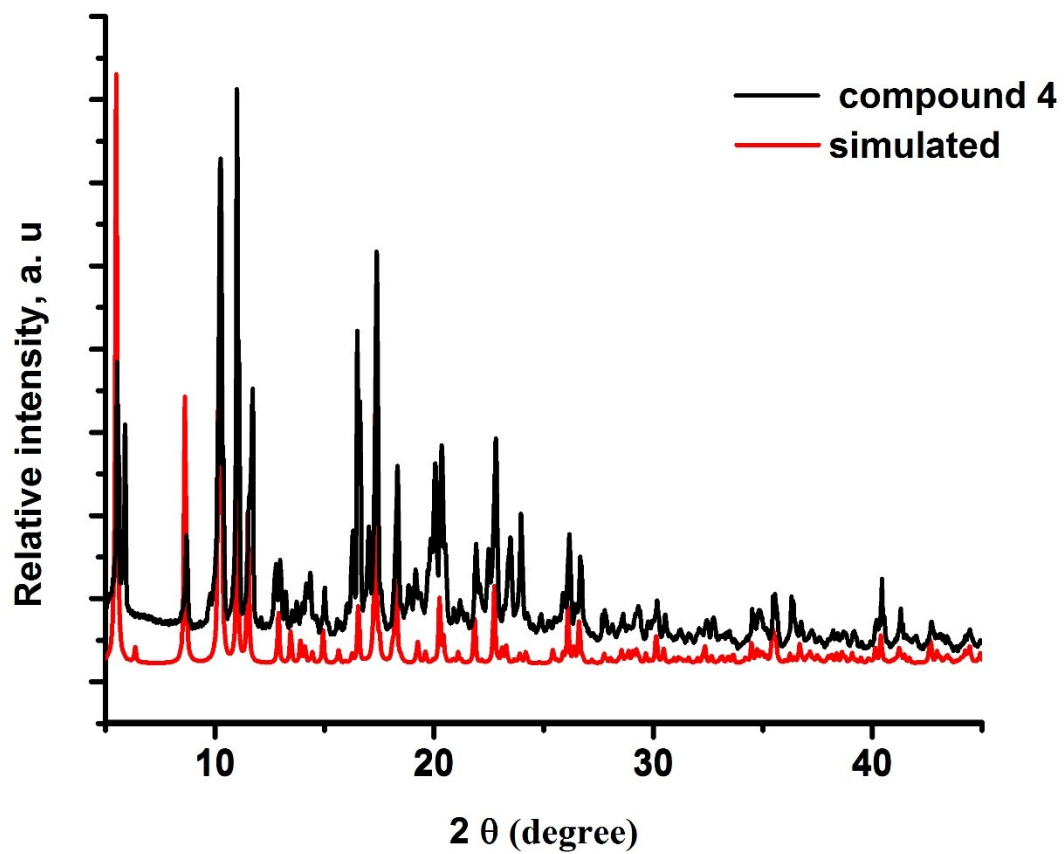

Fig S5. Powder XRD pattern of compound 4.



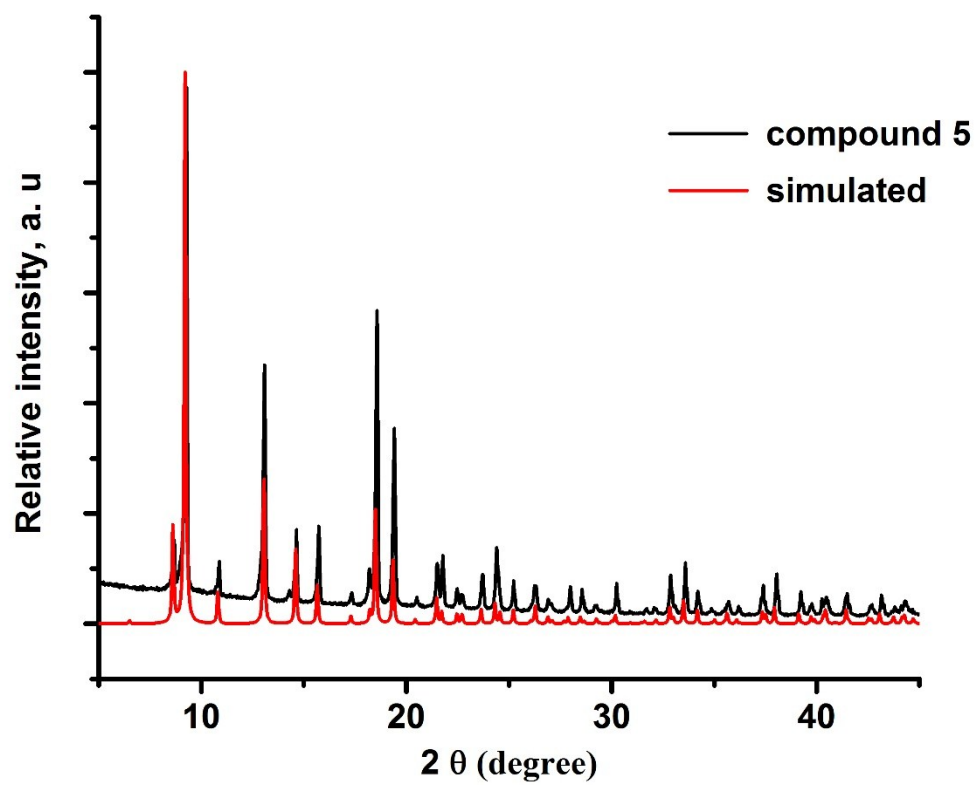

Fig S6. Powder XRD pattern of compound 5.

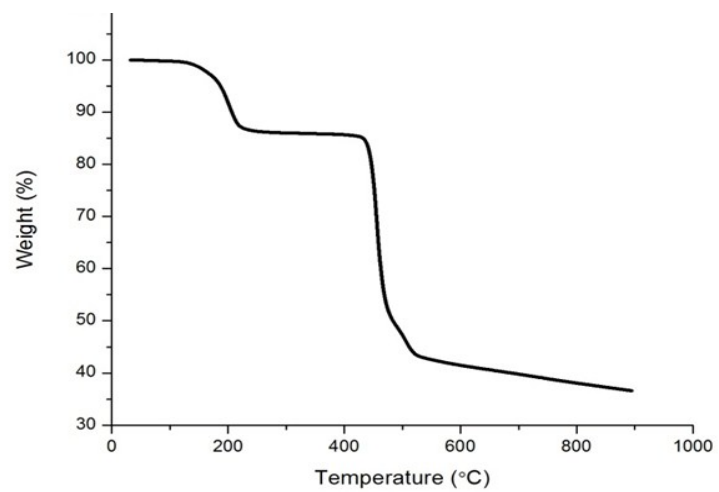

Fig. S7. Thermogravimetric analysis plot of compound **1**.

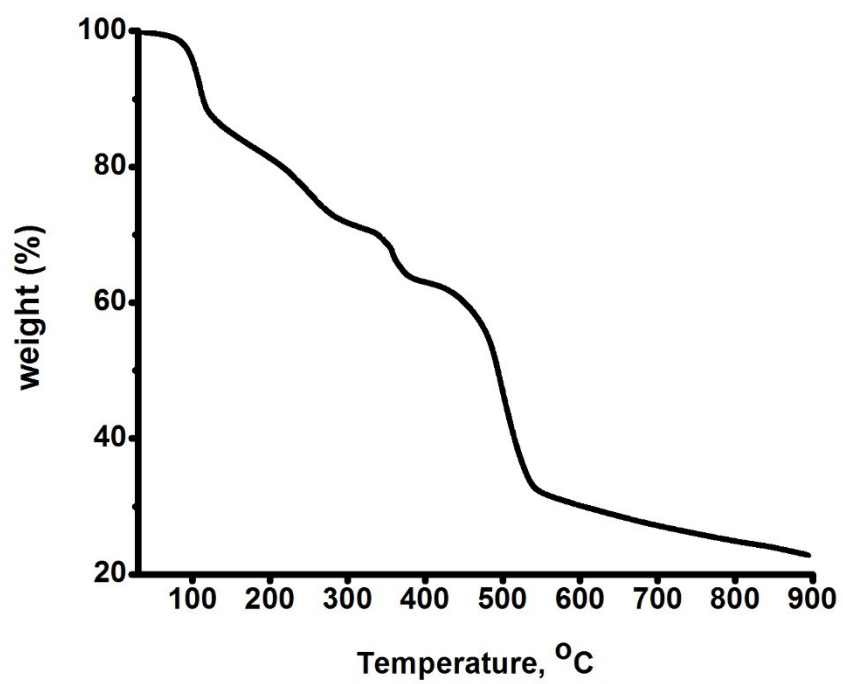

Fig. S8. Thermogravimetric analysis plot of compound 2.

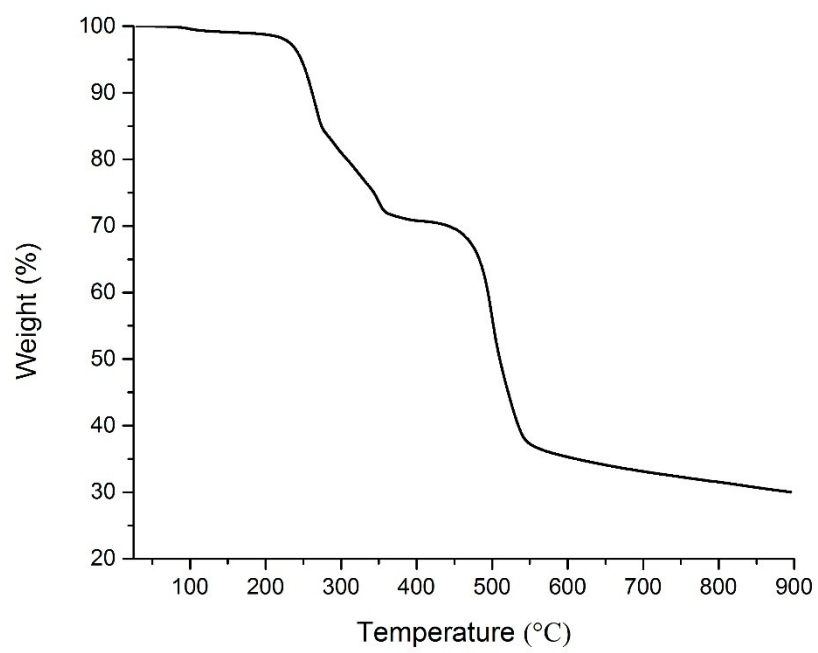

Fig. S9. Thermogravimetric analysis plot of compound 3.

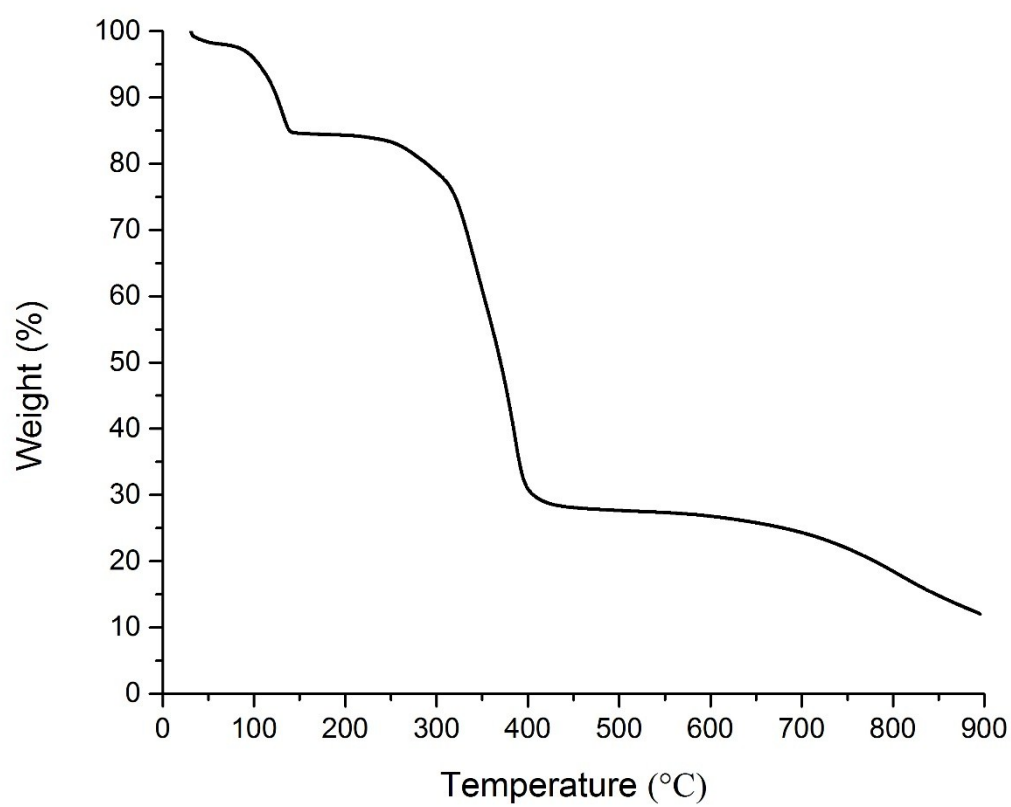

Fig. S10. Thermogravimetric analysis plot of compound 4.

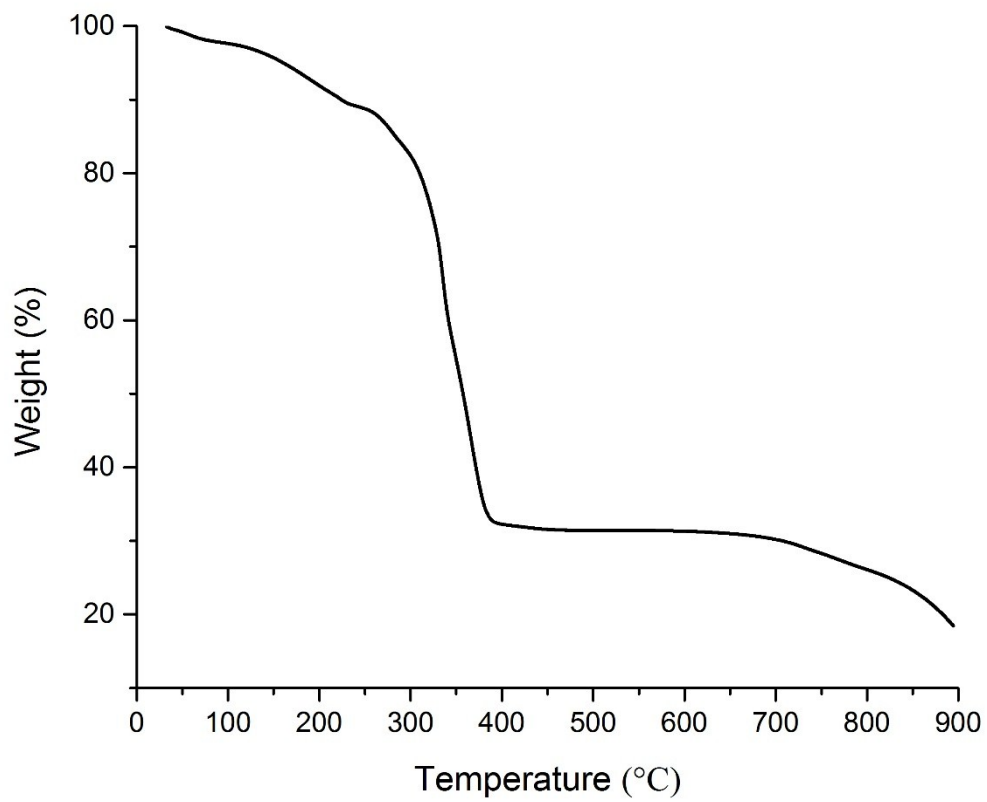

Fig. S11. Thermogravimetric analysis plot of compound 5.

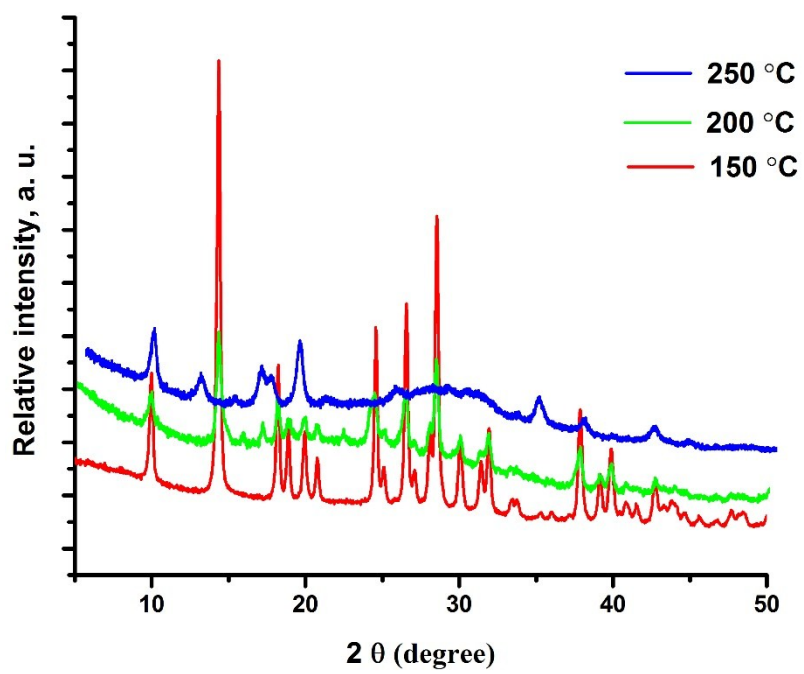

Fig. S12. PXRD pattern at different temperatures for compound 1.

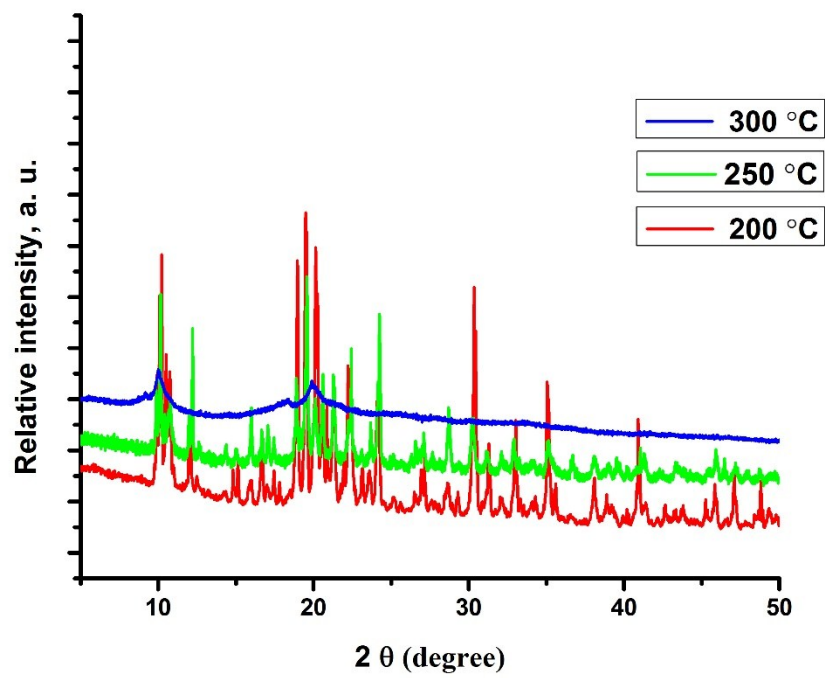

Fig. S13. PXRD pattern at different temperatures for compound 3.



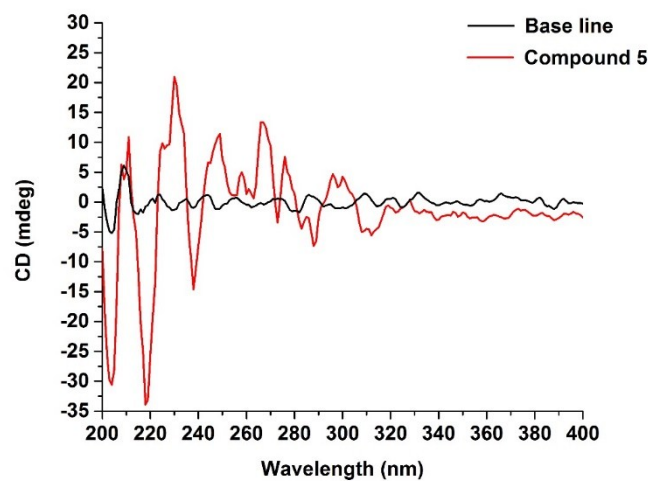

Fig. S14. The solid CD spectra of compound **5** (red line) and KBr pellet (black line).

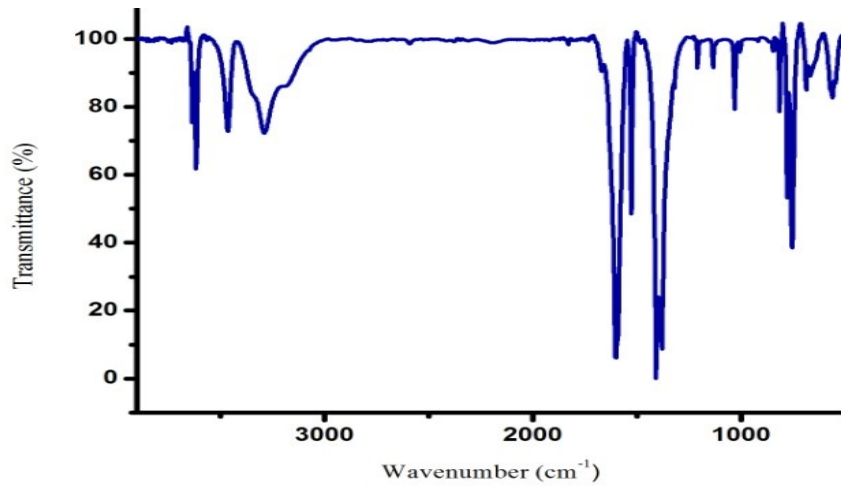

Fig. S15. Characteristic IR spectra of compound 1.

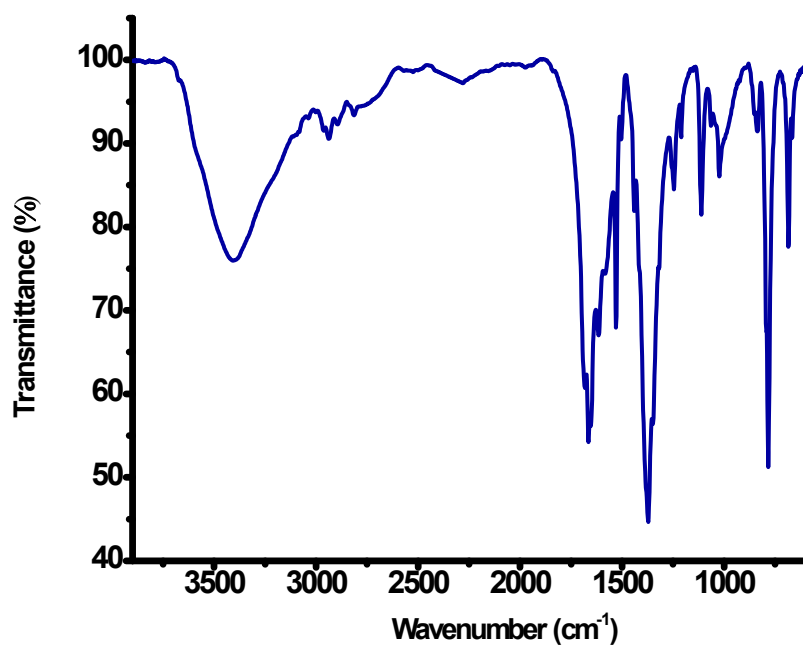

Fig. S16. Characteristic IR spectra of compound 2.

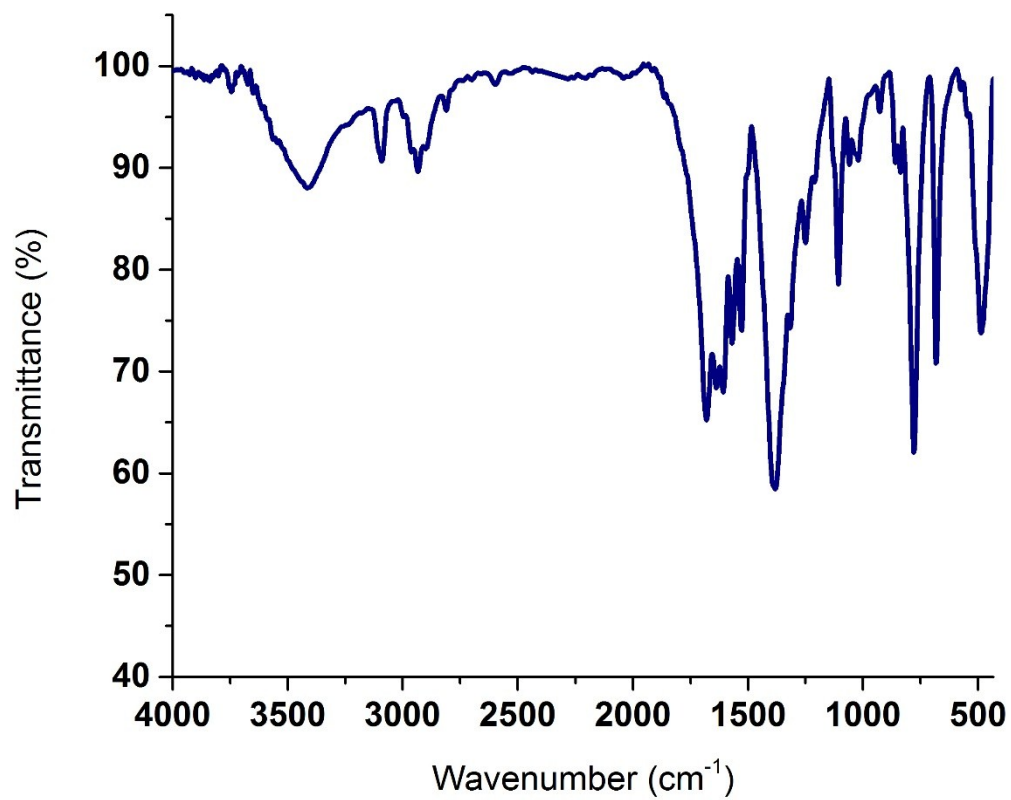

Fig. S17. Characteristic IR spectra of compound 3.

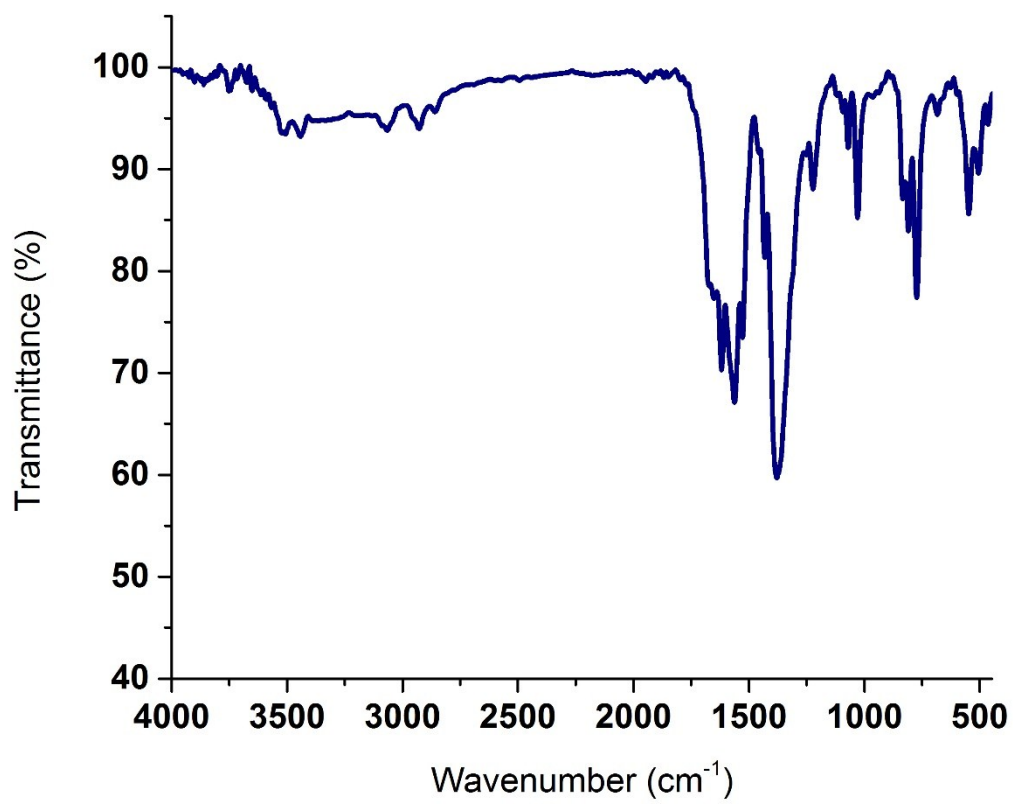

Fig. S18. Characteristics IR spectra of compound **4**.

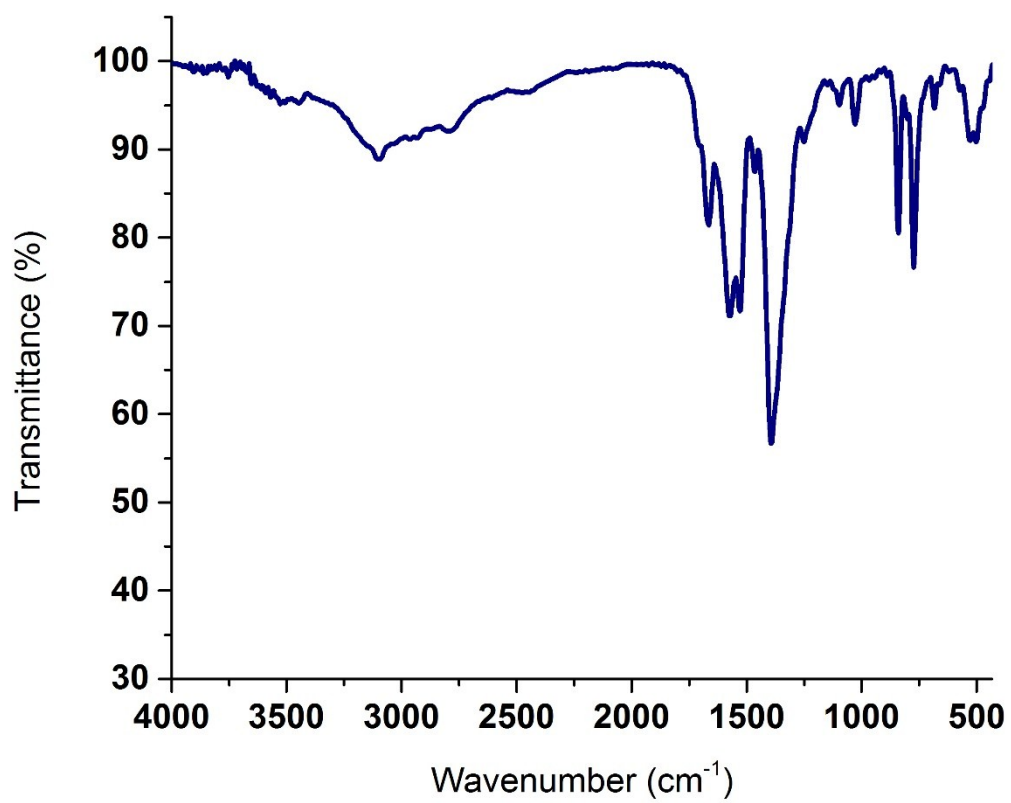

Fig. S19. Characteristics IR spectra of compound 5.
